# Supplementary material
Source: HighWire-hosted journal article supplement (https://www.cancerbiomed.org/content/20/5/385)
Supplement: media-1 [file media-1.pdf]

# Supplementary materials

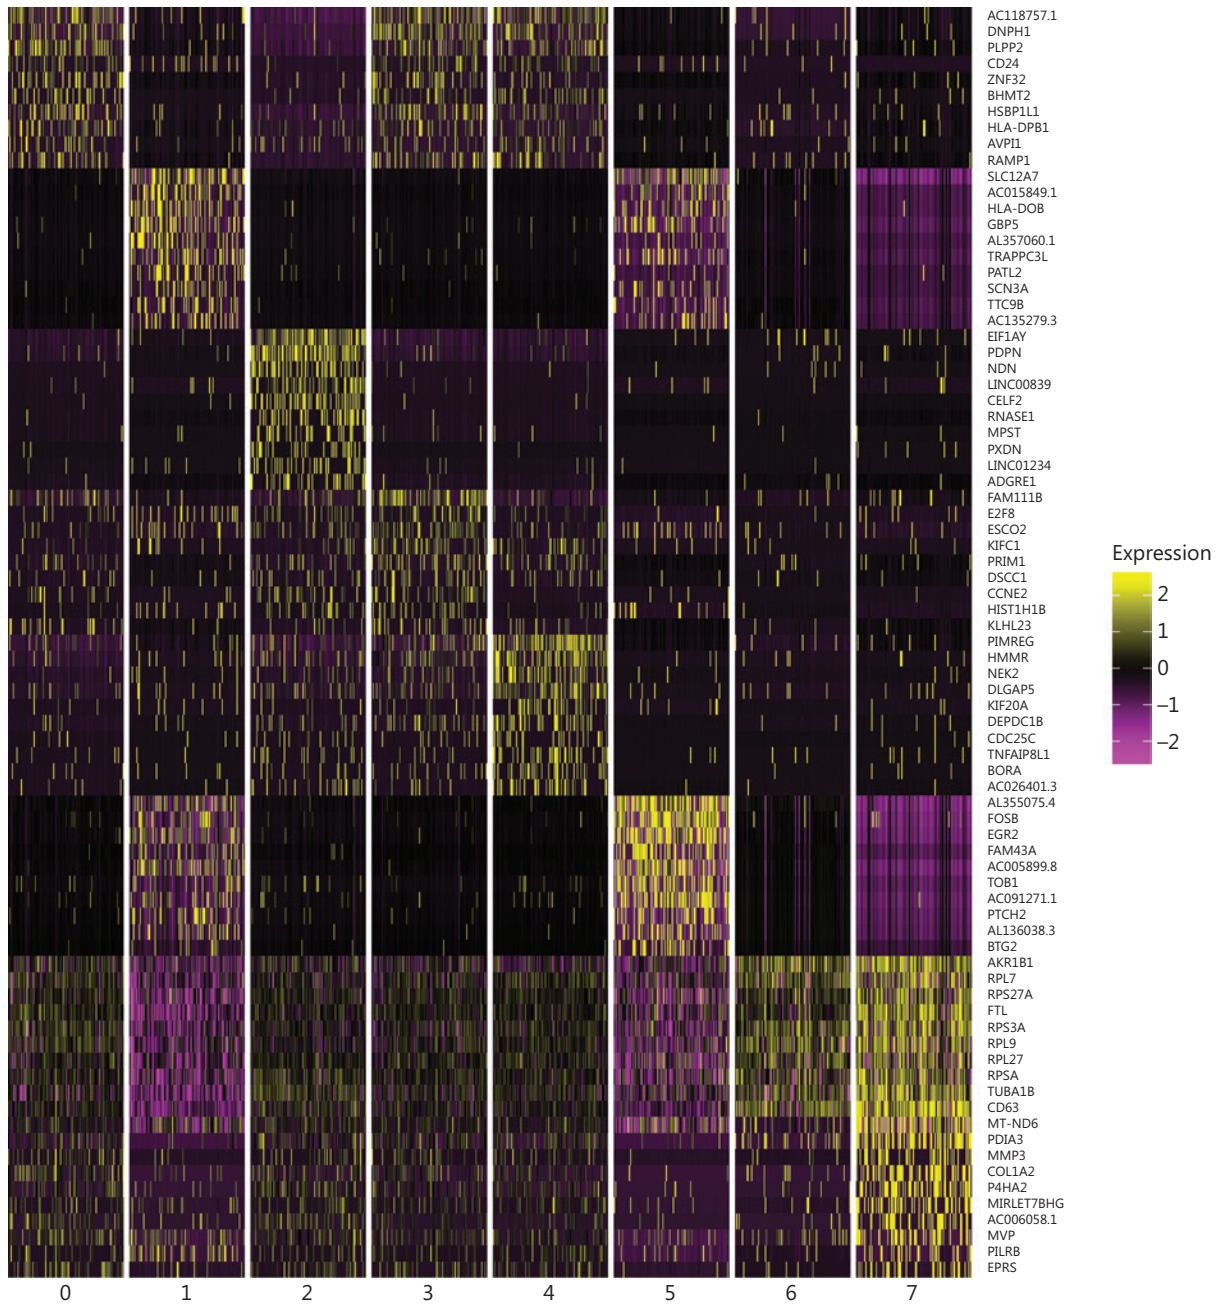

**Figure S1** Expression profiles of the top 10 marker genes of each cluster are displayed as a heatmap.

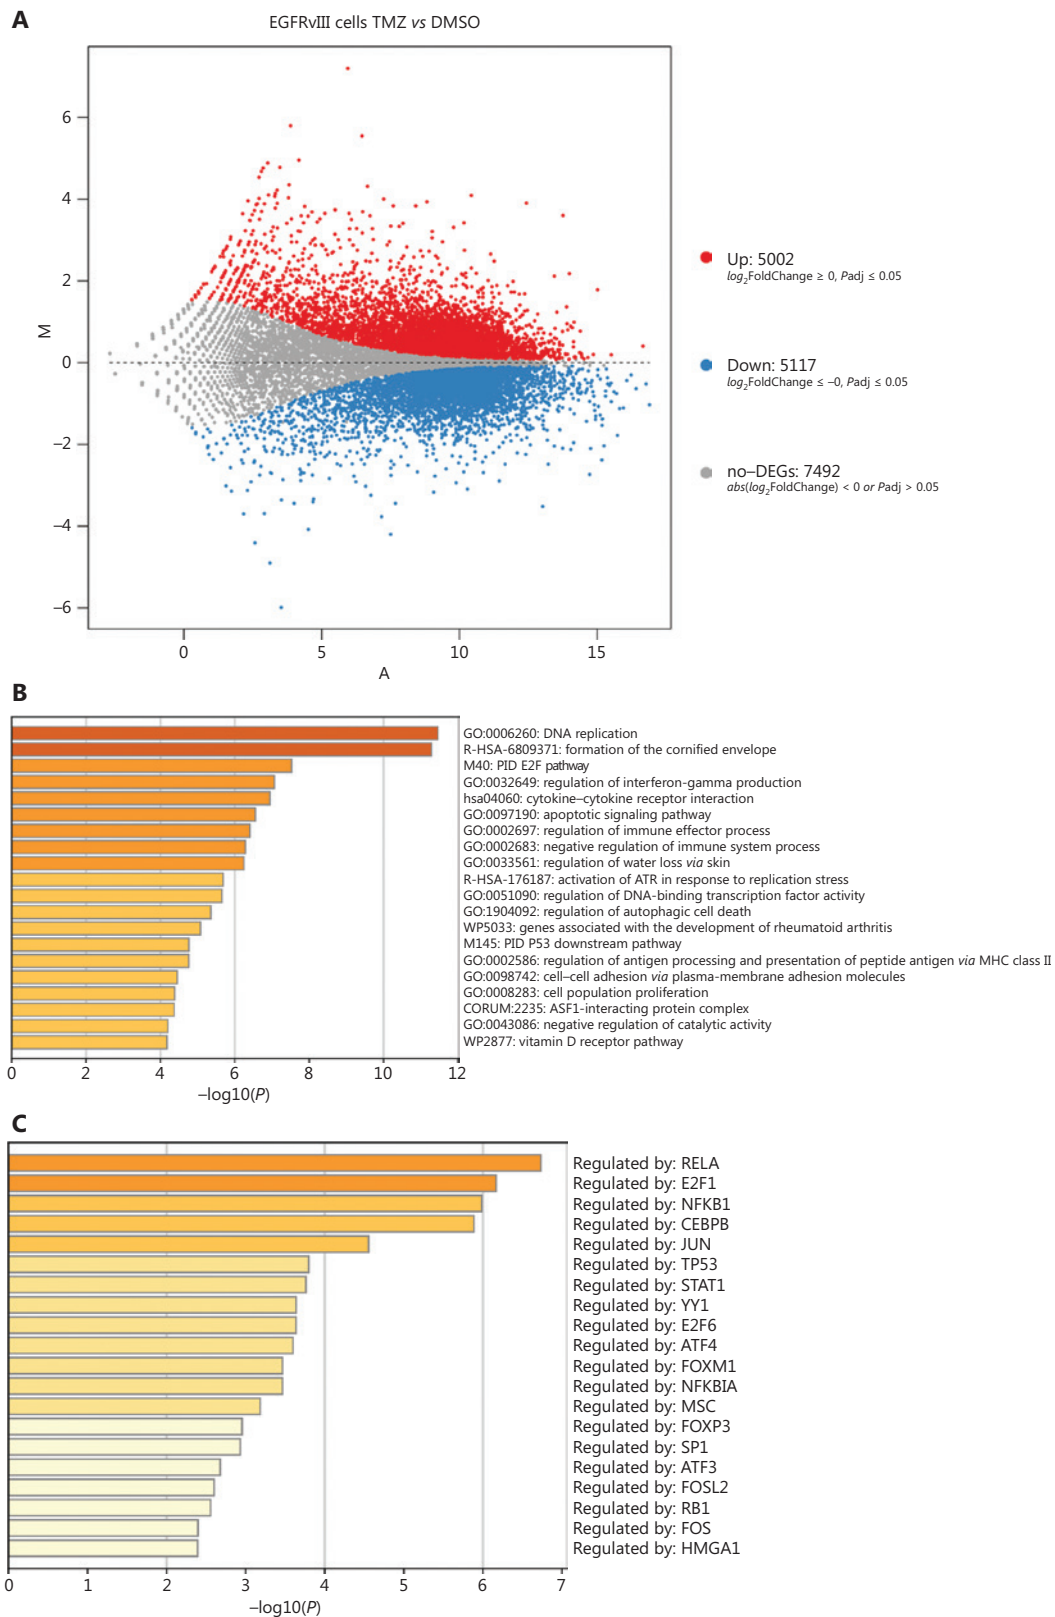

**Figure S2** Profile of U87vIII cells treated with TMZ. U87vIII cells were treated with 350  $\mu\text{M}$  TMZ for 14 d, and RNA-seq analysis was used to analyze gene expression. (A) The differentially-expressed genes are presented in volcano plots. (B) The enriched pathways after TMZ treatment. (C) Key transcription factors after TMZ treatment.
